# Supplementary material
Source: MDPI journal article supplement (https://www.mdpi.com/2073-4344/13/1/145)
Supplement: s1 [file s1]

# Supplementary materials

Bienzymatic cascade combining a peroxygenase with an oxidase for the synthesis of aromatic aldehydes from benzyl alcohols

Yunjian Ma<sup>1,2</sup>, Zongquan Li<sup>2</sup>, Hao Zhang<sup>2</sup>, Vincent Kam Wai Wong<sup>1</sup>, Frank Hollmann<sup>3\*</sup> and Yonghua Wang<sup>2,4\*</sup>

<sup>1</sup> Neher's Biophysics Laboratory for Innovative Drug Discovery, State Key Laboratory of Quality Research in Chinese Medicine, Macau University of Science and Technology, Taipa, Macau, China;

<sup>2</sup> School of Food Science and Engineering, South China University of Technology, Guangzhou 510640, China;

<sup>3</sup> Department of Biotechnology, Delft University of Technology, Van der Maasweg 9, 2629HZ, Delft, The Netherlands;

<sup>4</sup> Guangdong Youmei Institute of Intelligent Bio-manufacturing Co., Ltd, Foshan, Guangdong 528200, China.

\* Correspondence: yonghw@scut.edu.cn (Yonghua Wang); Tel.: +86-20-8711-3842

F.Hollmann@tudelft.nl (Frank Hollmann); Tel.: +31-15-278 1957

**Table S1.** Retention time of different aromatic primary alcohols / aromatic aldehydes

| Substrate/<br>product                 | Structure of substrate/<br>product                                                   | TR (min) |
|---------------------------------------|--------------------------------------------------------------------------------------|----------|
| Ethyl acetate<br>(Extraction solvent) | 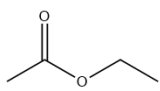 | 2.2      |
| N-dodecane<br>(Internal standard)     |  | 4.5      |
| Acetonitrile<br>(Cosolvent)           | $\text{H}_3\text{C}-\text{C}\equiv\text{N}$                                          | 2.0      |
| Veratryl alcohol                      |  | 21.7     |
| Veratryl aldehyde                     |  | 19.8     |
| Benzyl alcohol                        |  | 16.2     |

|                                   |                                                                                      |      |
|-----------------------------------|--------------------------------------------------------------------------------------|------|
| Benzaldehyde                      | 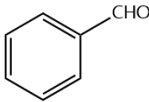   | 8.4  |
| 2-hydroxybenzyl alcohol           |    | 11.7 |
| Salicylaldehyde                   |    | 8.9  |
| Cinnamyl alcohol                  |    | 19.3 |
| Cinnamaldehyde                    |    | 17.7 |
| p-methoxybenzyl alcohol           |  | 19.3 |
| Anisaldehyde                      |  | 17.6 |
| 4-hydroxy-3-methoxybenzyl alcohol |  | 23.4 |
| Vanillin                          |  | 20.1 |

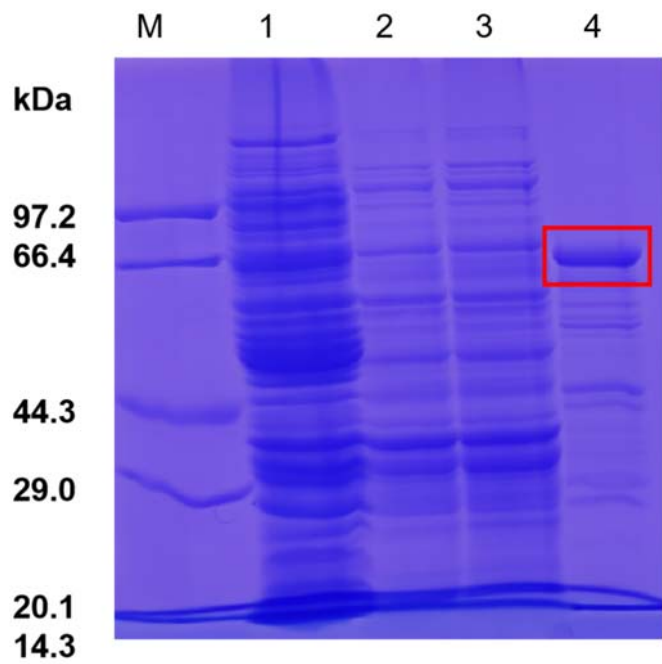

**Figure S1.** SDS-PAGE of *PeAAOx* (M: Marker; 1: total bacteria; 2, 3: supernatant; 4: renaturing enzyme solution)

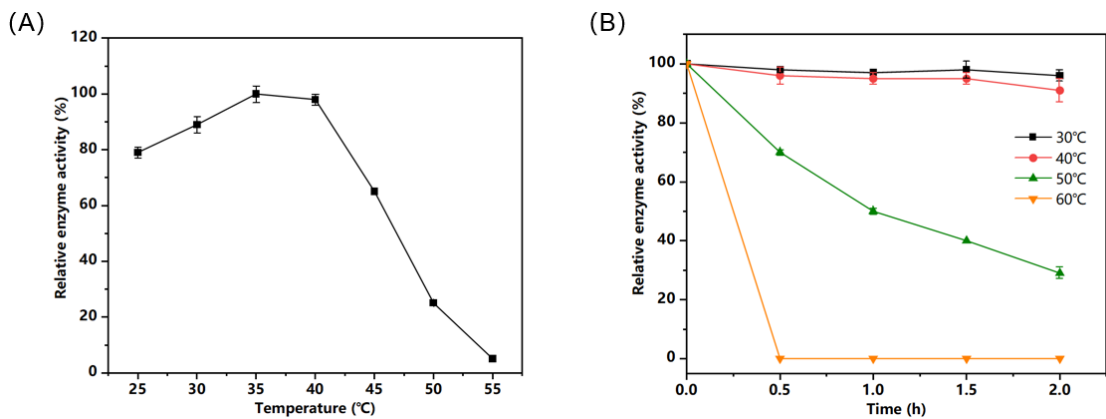

**Figure S2.** Effect of temperature on *PeAAOx* enzyme activity (A) and tolerance of *PeAAOx* to temperature (B)

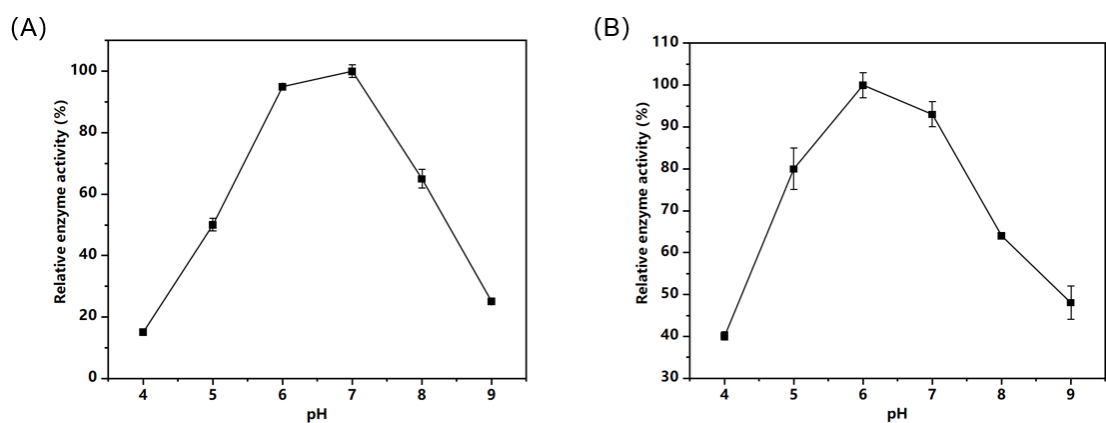

Figure S3. Effect of pH on *PeAAOx* enzyme activity (A) and tolerance of *PeAAOx* to pH (B)

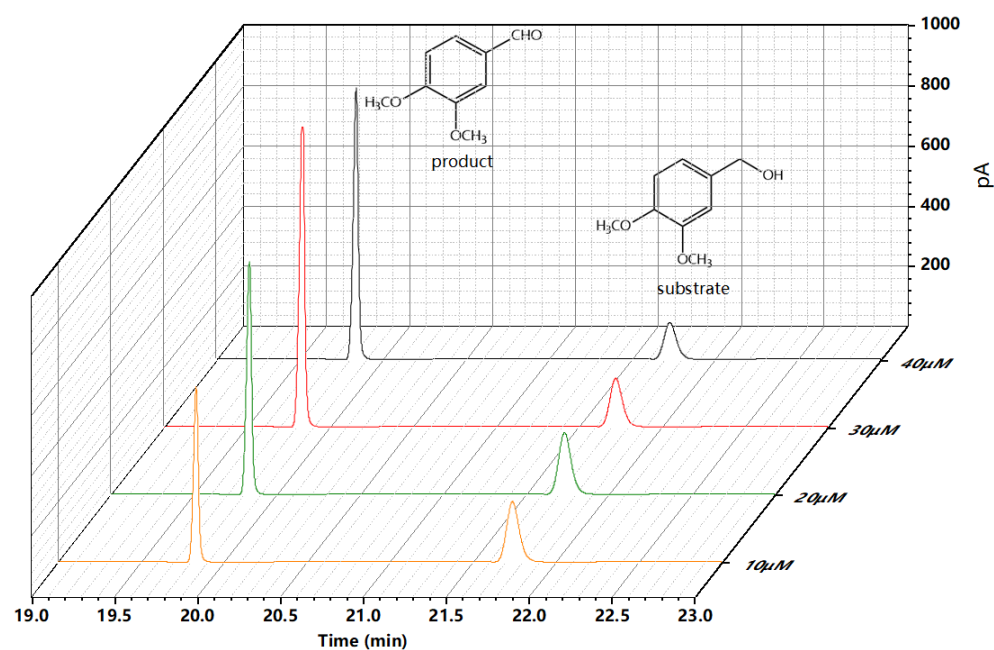

Figure S4. Gas chromatograms of different *PeAAOx* enzyme dosages used to catalyze the reaction of aromatic primary alcohols for 24 h. (Reaction conditions: [*PeAAOx*] = 10, 20, 30 and 40  $\mu\text{M}$ , [*Aae-UPO*] = 2  $\mu\text{M}$ , [veratryl alcohol] = 50 mM (pre-dissolved in acetonitrile), 30°C, pH 7, 24h and 500 rpm)

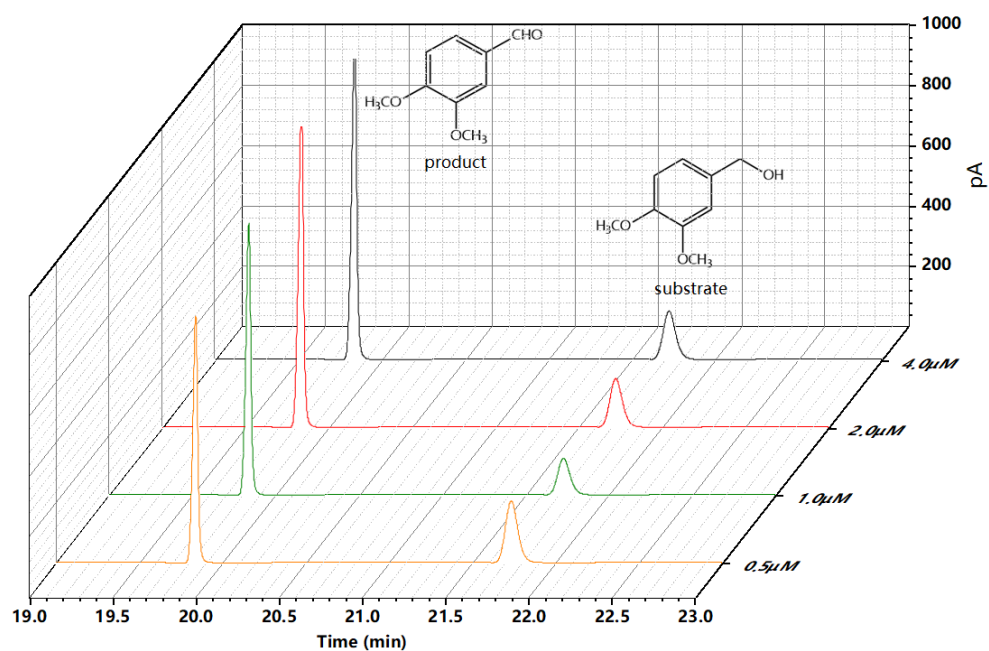

**Figure S5.** Gas chromatograms of different AaeUPO enzyme dosages used to catalyze the reaction of aromatic primary alcohols for 24 h. (Reaction conditions:  $[PeAAOx] = 30 \mu M$ ,  $[AaeUPO] = 0.5, 1.0, 2.0$  and  $4.0 \mu M$ , [veratryl alcohol] = 50 mM (pre-dissolved in acetonitrile),  $30^\circ C$ , pH 7, 24h and 500 rpm)

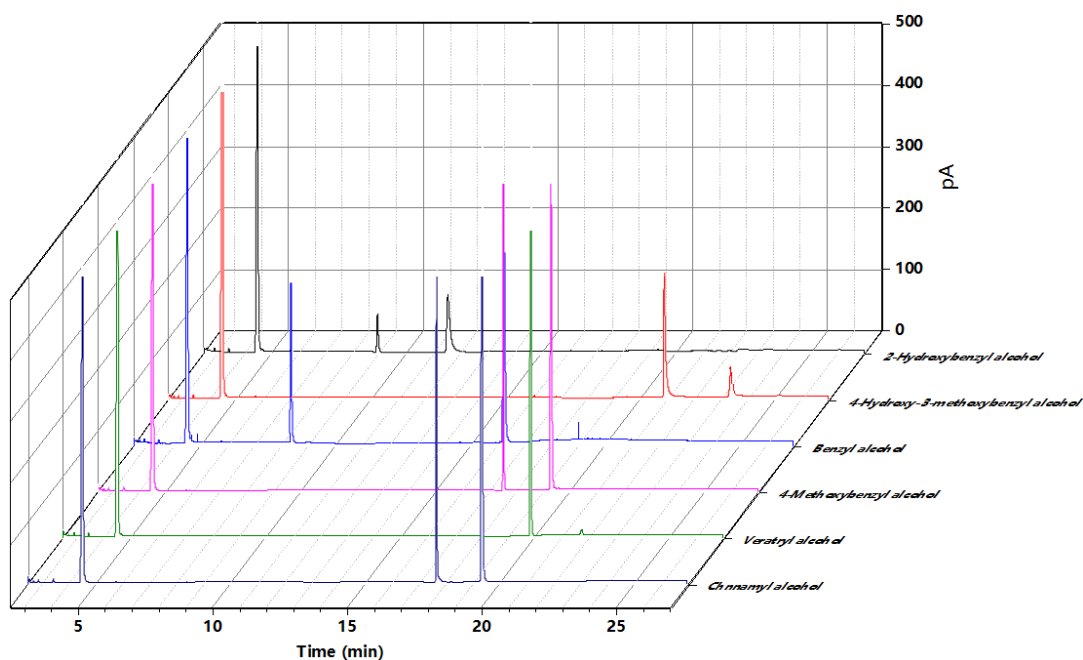

**Figure S6.** The gas chromatogram of the substrate expansion study (the specific peak time is shown in Table S1). (Reaction conditions:  $[PeAAOx] = 30 \mu M$ ,  $[AaeUPO] = 2 \mu M$ , [substrate] = 50 mM (pre-dissolved in acetonitrile),  $40^\circ C$ , pH 7, 500 rpm, 24 h)
